# Supplementary material for: Silencing of Tyms and Plk1 Sensitises Malignant Mesothelioma Cells to Gemcitabine
Source: MDPI journal article supplement (doi:10.3390/life11080811), 2011-06-01
Supplement: s1 [file s1]

**Table S1.** Search terms.

| <b>Pubmed</b> |                                                                                                                         |
|---------------|-------------------------------------------------------------------------------------------------------------------------|
| 1             | "sarcopenia"[all fields]                                                                                                |
| 2             | "sarcopeni*"[title/abstract]                                                                                            |
| 3             | "frail*"[title/abstract]                                                                                                |
| 4             | "muscle*"[title/abstract]                                                                                               |
| 5             | "muscle atrophy"[all fields]                                                                                            |
| 6             | "muscular atrophy"[all fields]                                                                                          |
| 7             | "muscle mass"[all fields]                                                                                               |
| 8             | "muscle weak*"[all fields]                                                                                              |
| 9             | "Lean body mass"[all fields]                                                                                            |
| 10            | "fat free mass"[all fields]                                                                                             |
| 11            | "Body composition"[all fields]                                                                                          |
| 12            | "muscle strength"[all fields]                                                                                           |
| 13            | "grip strength"[all fields]                                                                                             |
| 14            | "hand strength"[all fields]                                                                                             |
| 15            | "physical performance"[all fields]                                                                                      |
| 16            | "physical function*"[all fields]                                                                                        |
| 17            | "aging phenotype*"[all fields]                                                                                          |
| 18            | "mobility "[all fields]                                                                                                 |
| 19            | "disability"[all fields]                                                                                                |
| 20            | "gait"[all fields]                                                                                                      |
| 21            | "walking"[all fields]                                                                                                   |
| 22            | "timed get up and go"[all fields]                                                                                       |
| 23            | 1 OR 2 OR 3 OR 4 OR 5 OR 6 OR 7 OR 8 OR 9 OR 10 OR 11 OR 12 OR 13 OR 14 OR 15 OR 16 OR 17 OR 18 OR 19 OR 20 OR 21 OR 22 |
| 24            | "diet"[all fields]                                                                                                      |
| 25            | "diet*"[title/abstract]                                                                                                 |
| 26            | "diets"[all fields]                                                                                                     |
| 27            | "food habit*"[all fields]                                                                                               |
| 28            | "healthy eating"[title/abstract]                                                                                        |
| 29            | "healthful eating"[title/abstract]                                                                                      |
| 30            | "eating habit*"[title/abstract]                                                                                         |
| 31            | "eating pattern*"[title/abstract]                                                                                       |
| 32            | "food habit*"[title/abstract]                                                                                           |
| 33            | "dietary pattern*"[title/abstract]                                                                                      |
| 34            | "dietary quality"[title/abstract]                                                                                       |
| 35            | "dietary adherence"[title/abstract]                                                                                     |
| 36            | "food pattern*"[title/abstract]                                                                                         |
| 37            | "Mediterranean"[title/abstract]                                                                                         |
| 38            | "dietary score"[title/abstract]                                                                                         |
| 39            | "meal"[title/abstract]                                                                                                  |
| 40            | 24 OR 25 OR 26 OR 27 OR 28 OR 29 OR 30 OR 31 OR 32 OR 33 OR 34 OR 35 OR 36 OR 37 OR 38 OR 39                            |
| 41            | "old"[all fields]                                                                                                       |
| 42            | "older*"[all fields]                                                                                                    |
| 43            | "elder*"[all fields]                                                                                                    |
| 44            | "senior*"[all fields]                                                                                                   |
| 45            | "aging"[all fields]                                                                                                     |
| 46            | 41 OR 42 OR 43 OR 44 OR 45                                                                                              |
| 47            | 23 AND 40 AND 46, Filter: MEDLINE, human, and English                                                                   |
| <b>EMBASE</b> |                                                                                                                         |

|   |                                                                                                                                                                                                                                                                                                                                                                                                                    |
|---|--------------------------------------------------------------------------------------------------------------------------------------------------------------------------------------------------------------------------------------------------------------------------------------------------------------------------------------------------------------------------------------------------------------------|
| 1 | sarcopenia OR sarcopeni*:ab,ti OR frail*:ab,ti OR muscle*:ab,ti OR 'muscle atrophy' OR 'muscular atrophy' OR 'muscle mass' OR 'muscle weak*' OR 'lean body mass' OR 'fat free mass' OR 'body composition' OR 'muscle strength' OR 'grip strength' OR 'hand strength' OR 'physical performance' OR 'physical function*' OR 'aging phenotype*' OR mobility OR disability OR gait OR walking OR 'timed get up and go' |
| 2 | diet OR diet*:ab,ti OR diets OR 'food habit*' OR 'healthy eating':ab,ti OR 'healthful eating':ab,ti OR 'eating habit':ab,ti OR 'eating pattern':ab,ti OR 'food habit':ab,ti OR 'dietary pattern':ab,ti OR 'dietary quality':ab,ti OR 'dietary adherence':ab,ti OR 'food pattern':ab,ti OR mediterranean:ab,ti OR 'dietary score':ab,ti OR meal:ab,ti                                                               |
| 3 | old OR older* OR elder* OR senior* OR aging                                                                                                                                                                                                                                                                                                                                                                        |
| 4 | 1 AND 2 AND 3 AND [1-1-1947]/sd NOT [1-12-2020]/sd                                                                                                                                                                                                                                                                                                                                                                 |
